# Supplementary material
Source: publisher site journal article supplement (https://www.dovepress.com/article/449096)
Supplement: Supplementary file 1 [file get_supplementary_file.php]

**Supplementary Table 1** Distribution of Psychotropic Substances and Corresponding Dosages

| **Distribution of Psychotropic Substance** | **Number (%)** | **Mean Dose (mg/d)** |
| --- | --- | --- |
| Quetiapine | 48(34.3) | 540.4 |
| Risperidone | 32(22.9) | 4.7 |
| Aripiprazole | 19(13.6) | 45.7 |
| Olanzapine | 16(11.4) | 24.3 |
| Clozapine | 5(3.6) | 135.0 |
| Paliperidone | 13(9.3) | 8.5 |
| Ziprasidone | 4(2.9) | 105.0 |
| Amisulpride | 3(2.1) | 466.7 |

**Supplementary Table 2** PANSS Scale Scores for the HTR1A Genotype from Baseline to 12 Weeks Follow-up

| **Genotypes** | **Number** | **Baseline** | **3 Week** | **6 Week** | **12 Week** |
| --- | --- | --- | --- | --- | --- |
| rs10042486 |  |  |  |  |  |
| CC | 4 | 103.75 (93.95 - 113.65) | 70.00 (56.21 - 83.79) | 52.75 (41.39 - 64.11) | 52.25 (42.64 - 61.86) |
| CT | 45 | 109.22 (105.75 - 112.65) | 70.96 (65.87 - 76.05) | 54.84 (50.54 - 59.14) | 45.23 (41.27 - 49.19) |
| TT | 91 | 106.70 (104.59 - 108.81) | 67.38 (64.20 - 70.56) | 54.14 (51.06 - 57.22) | 46.29 (42.98 - 49.60) |
| *P*-value |  | 0.448 | 0.526 | 0.936 | 0.333 |
| rs6295 |  |  |  |  |  |
| CC | 8 | 106.38 (100.57 - 112.23) | 74.00 (64.73 - 83.27) | 56.88 (47.69 - 66.07) | 55.67 (46.84 - 64.50) |
| CG | 48 | 108.65 (105.28 - 111.92) | 69.42 (64.51 - 74.33) | 53.53 (49.36 - 57.70) | 44.03 (40.46 - 47.60) |
| GG | 84 | 106.83 (104.56 - 109.04) | 67.63 (64.30 - 70.96) | 54.47 (51.28 - 57.66) | 46.37 (42.95 - 49.79) |
| *P*-value |  | 0.782 | 0.505 | 0.798 | 0.057 |
